# Supplementary material for: Analysis of LhcSR3, a Protein Essential for Feedback De-Excitation in the Green Alga Chlamydomonas reinhardtii
Source: PubMed Central journal article supplement (PMC3022525; doi:10.1371/journal.pbio.1000577), 2011-01-18
Supplement: pbio.1000577.s003.pdf [file pbio.1000577.s003.pdf]

**Table S1: Picomoles of zeaxanthin, violaxanthin and antheraxanthin before and after NPQ induction. Dep. Index is calculated as  $(Z+A/2)/(Z+V+A)$ . Data about *A.thaliana* from (1).**

|                                               | <b>Viola</b> | <b>Anthera</b> | <b>Zea</b>  | <b>Chls</b>  | <b>Dep. Index</b> |
|-----------------------------------------------|--------------|----------------|-------------|--------------|-------------------|
| <b>HL cells</b>                               | <b>6.7</b>   | <b>1.0</b>     | <b>1.0</b>  | <b>100.0</b> | <b>0.2</b>        |
| <b>HL cells after NPQ induction</b>           | <b>3.8</b>   | <b>1.7</b>     | <b>1.9</b>  | <b>100.0</b> | <b>0.4</b>        |
| <b><i>A. thaliana</i></b>                     | <b>2.8</b>   | <b>n.d.</b>    | <b>n.d.</b> | <b>100.0</b> | <b>0.0</b>        |
| <b><i>A. thaliana</i> after NPQ induction</b> | <b>1.4</b>   | <b>0.4</b>     | <b>2.3</b>  | <b>100.0</b> | <b>0.6</b>        |

#### REFERENCES

1. Dall'Osto, L., S. Caffarri, and R. Bassi (2005) A mechanism of nonphotochemical energy dissipation, independent from PsbS, revealed by a conformational change in the antenna protein CP26. *Plant Cell* **17**, 1217-1232.
